1 The effects of drought and nutrient addition on soil organisms  
2 vary across taxonomic groups, but are constant across  
3 seasons  
4

5 *Julia Siebert*<sup>1,2,§,\*</sup>, *Marie Sünnemann*<sup>1,3,§</sup>, *Harald Auge*<sup>1,4</sup>, *Sigrid Berger*<sup>4</sup>, *Simone Cesarz*<sup>1,2</sup>, *Marcel Ciobanu*<sup>5</sup>,  
6 *Nathaly R. Guerrero-Ramírez*<sup>1,2</sup>, *Nico Eisenhauer*<sup>1,2</sup>

7

8 *1 German Centre for Integrative Biodiversity Research (iDiv) Halle-Jena-Leipzig, Deutscher Platz 5e, 04103*  
9 *Leipzig, Germany*

10 *2 Institute of Biology, Leipzig University, Deutscher Platz 5e, 04103 Leipzig, Germany*

11 *3 Martin-Luther-University Halle-Wittenberg, Leibniz Institute of Plant Biochemistry, Weinberg 3, 06120*  
12 *Halle (Saale), Germany*

13 *4 Department of Community Ecology, Helmholtz-Centre for Environmental Research – UFZ, Theodor-*  
14 *Lieser-Str. 4, 06120 Halle, Germany*

15 *5 Institute of Biological Research, Branch of the National Institute of Research and Development for*  
16 *Biological Sciences, 48 Republicii Street, 400015 Cluj-Napoca, Romania*

17

18 <sup>§</sup> *these authors contributed equally to this work*

19 *\*corresponding author ([julia.siebert@idiv.de](mailto:julia.siebert@idiv.de))*

20

## 21 Abstract

22 Anthropogenic global change alters the activity and functional composition of soil communities that are  
23 responsible for crucial ecosystem functions and services. Two of the most pervasive global change drivers  
24 are drought and nutrient enrichment. However, the responses of soil organisms to interacting global  
25 change drivers remain widely unknown. We tested the interactive effects of extreme drought and  
26 fertilization on soil biota ranging from microbes to invertebrates across seasons. We expected drought to  
27 reduce the activity of soil organisms and fertilization to induce positive bottom-up effects *via* increased  
28 plant productivity. Furthermore, we hypothesized fertilization to reinforce drought effects through  
29 enhanced plant growth, resulting in even dryer soil conditions. Our results revealed that drought had  
30 detrimental effects on soil invertebrate feeding activity and simplified nematode community structure,  
31 whereas soil microbial activity and biomass were unaffected. Microbial biomass increased in response to  
32 fertilization, whereas invertebrate feeding activity substantially declined. Notably, these effects were  
33 consistent across seasons. The dissimilar responses suggest that soil biota differ vastly in their  
34 vulnerability to global change drivers. As decomposition and nutrient cycling are driven by the  
35 interdependent concurrence of microbial and faunal activity, this may imply far-reaching consequences  
36 for crucial ecosystem processes in a changing world.

37

## 38 Introduction

39 Anthropogenic global environmental change affects ecosystem properties worldwide and threatens  
40 important ecosystem functions<sup>1,2</sup>. Climate change is predicted to alter precipitation regimes towards more  
41 frequent and severe drought events in the future<sup>3</sup>. Simultaneously, human activities, such as fossil fuel  
42 combustion and fertilization, are causing an acceleration of the turnover rates of the nitrogen cycle and  
43 will double nitrogen deposition in the future<sup>4,5</sup>. The same is true for phosphorous inputs, which also  
44 increased at a global scale<sup>6</sup>. Thus, multiple global change drivers are occurring side by side, and their  
45 effects are not necessarily additive or antagonistic. Our knowledge on their interactive effects, however,  
46 is still highly limited<sup>7,8</sup>. This is particularly true for the responses of soil organisms, which mediate crucial  
47 ecosystem functions and services, such as nutrient cycling and decomposition<sup>9,10</sup>. Their significant role is  
48 not adequately reflected in the body of global change literature yet. Therefore, a more comprehensive  
49 understanding of above- and belowground dynamics is key to predict the responses of terrestrial  
50 ecosystems in a changing world<sup>7</sup>.

51

52 Many soil organisms are dependent on a water-saturated atmosphere or on water films on soil  
53 aggregates<sup>11-14</sup>. Altered precipitation patterns will result in drought periods, which are likely to have  
54 substantial effects on their abundances and community structure, thus affecting important soil organism-  
55 mediated ecosystem processes. Previous studies reported detrimental effects of drought on soil microbial  
56 respiration and biomass as well as a reduction of the diversity of microbial communities<sup>15</sup>. Furthermore,  
57 drought was shown to cause a decline in soil microarthropod abundances<sup>16</sup>. In contrast, drought seems  
58 to have only marginal effects on nematode community composition<sup>17</sup>. Yet, a reduction of soil moisture  
59 content can induce community shifts *via* lower trophic levels, often favouring fungal-feeding nematodes  
60 over bacteria-feeders, as fungi perform relatively better under dry conditions<sup>17,18</sup>.

61

62 Nutrient enrichment is another key factor that affects the soil community by altering the physical and  
63 chemical properties of the soil, e.g., by influencing pH-value, soil porosity, and organic fractions<sup>19-21</sup>.  
64 Nitrogen addition has been identified to decrease soil microbial respiration and biomass, often leading to  
65 shifts in the soil microbial community composition under the use of mineral fertilizer (NPK)<sup>22-24</sup>. On the  
66 other hand, fertilization treatments were shown to increase soil microbial catabolic and functional  
67 diversity<sup>25,26</sup>. Furthermore, nitrogen addition alters the nematode community structure towards  
68 bacterivores, thus promoting the bacterial-dominated decomposition pathway<sup>27</sup>, and was shown to  
69 simplify communities<sup>17</sup>. At the same time, nitrogen enrichment is one of the major drivers determining  
70 aboveground primary production<sup>28</sup>. Nitrogen and phosphorous addition are known to increase total  
71 aboveground biomass and consequently the quantity and quality of plant litter input to the soil<sup>26,29</sup>. This  
72 enhances resource availability *via* bottom-up effects and can therefore increase soil microarthropod  
73 abundances<sup>30</sup>. Concurrently, the fertilization-induced increase in aboveground biomass may cause higher  
74 transpiration rates, which are likely to reinforce drought effects on soil organisms<sup>31</sup>.

75

76 To investigate the interactive effects of extreme drought events and fertilization (NPK), we established a  
77 field experiment at the UFZ Experimental Research Station (Bad Lauchstädt, Germany), which combines  
78 the treatments of two globally distributed networks – the Drought-Network and the Nutrient Network<sup>32</sup>.  
79 Here, we tested the responses of soil microorganisms, nematodes, and soil mesofauna to the interactive  
80 effects of extreme drought and fertilization (NPK) across all seasons. Based on prior research, we  
81 hypothesized that (1) drought will reduce the activity of soil organisms, whereas (2) fertilization will  
82 increase their activity, owing to enhanced plant litter input that subsequently increases resource  
83 availability for soil organisms. Furthermore, we predicted that (3) the interactive effects of drought and

84 fertilization will result in detrimental conditions for soil organisms as the negative effects of drought were  
85 expected to be further enhanced by increased plant growth under fertilization, resulting in reduced soil  
86 water availability for soil organisms.

87

## 88 Methods

### 89 i. Research site

90 The study site is located at the Experimental Research Station of the Helmholtz Centre for Environmental  
91 Research (UFZ), which is situated in Bad Lauchstädt, Germany. The field site is located in the central  
92 German dry area with a mean annual precipitation of 487 mm and an average annual daily temperature  
93 of 8.9°C (Meteorological data of Bad Lauchstädt, Helmholtz Centre for Environmental Research GmbH -  
94 UFZ, Department of Soil System Science, 1896-2017). The area represents an anthropogenic grassland,  
95 which is maintained by moderate mowing (twice a year since 2012). It is a successional plant community  
96 dominated by *Vulpia myuros* (L.) C. C. Gmel., *Picris hieracoides* (L.) and *Taraxacum officinale* (F. H. Wigg.)  
97 with *Apera spica-venti* (L.) P. Beauv. and *Cirsium arvense* (L.) Scop. being very common. The soil is  
98 classified as a haplic chernozem, developed upon carbonatic loess substrates, distinguished by a  
99 composition of 70% silt and 20% clay<sup>33</sup>.

100

### 101 ii. Weather conditions

102 Weather conditions within the two-year sampling period of this study were in line with the long-term  
103 average despite some exceptions: precipitation patterns deviated from the long-term average in 2016  
104 with a dry May (21.2 mm compared to 62.3 mm of the long-term record from 2005-2015) and a wet June  
105 (80.2 mm compared to 41.2 mm of the long-term record from 2005-2015). September tended to be dryer  
106 than usual in both years (19.5 mm in 2016 and 22.1 mm in 2017 compared to 51.8 mm of the long-term  
107 record from 2005-2015).

108

### 109 iii. Experimental design and treatments

110 The experimental site was established in March 2015. The experimental design consists of five blocks with  
111 five plots each. The plots have a size of 2 x 2 m and are arranged at a distance of 3 m from each other (Fig.  
112 S1). The experiment includes two treatments with two levels each (first applied in March 2016): drought  
113 (control/drought) and fertilization (no NPK/NPK addition), as well as their interaction (drought x  
114 fertilization). Notably, this experiment crosses treatments of two globally distributed experimental  
115 networks: the full NPK fertilization treatment of the Nutrient Network<sup>32</sup> and the drought treatment of the  
116 Drought-Network (<http://www.drought-net.colostate.edu/>).

117  
118 In order to simulate drought, a rainfall manipulation system was established<sup>34</sup> using corrugated acrylic  
119 strips. The roofs have a size of 3 x 3 m and reduce precipitation by 55% throughout the year, simulating a  
120 severe long-term reduction in precipitation. Roofs were built with a slope of 20° to ensure water runoff  
121 and account for the expected snow load in the region. Exclusion of potential artefacts was realized by  
122 equal roof constructions using inverted acrylic strips conceived to let rainfall pass<sup>35</sup> (Fig. S2). To control  
123 for possible infrastructure effects of the roof constructions itself, a fifth plot was added to each block  
124 without any roof construction (ambient plots), thus receiving ambient precipitation (not crossed with the  
125 fertilization treatment and thus not part of this study, see Fig. S1). To validate the drought treatment, soil  
126 water content was quantified on all plots in every sampling campaign. All three precipitation levels  
127 differed significantly in their soil water content (Tukey's HSD test,  $p < 0.05$ ): as intended, the lowest soil  
128 water content was found for the drought treatment (-19.4% compared to the ambient plots). Also the  
129 infrastructure control plots (with concave roof constructions) differed significantly from the ambient plots  
130 (without roof construction), indicating that there were effects of the roof construction itself (-13.4%).  
131 Furthermore, soil water content varied significantly between seasons (Table S1; Fig. S3).

132 The fertilization treatment was realized by annual addition of a mixture of nitrogen (N), phosphorus (P)  
133 and potassium (K) (i.e. NPK fertilization; applied at  $10 \text{ g m}^{-2} \text{ y}^{-1}$  by elemental mass) before each growing  
134 season. In addition, the micronutrient mix “Micromax Premium” (Evertis) was applied in the first  
135 treatment year<sup>32</sup>.

136

#### 137 iv. Soil sampling

138 The first soil sampling took place in March 2016. Sampling campaigns were repeated every three months  
139 to cover every season (spring, summer, fall, winter) from March 2016 to December 2017 (i.e., eight  
140 samplings across two years). Samples were taken on all plots with roof construction (drought and control)  
141 with a steel core sampler (1 cm in diameter; 15 cm deep). Seven subsamples per plot were homogenized,  
142 sieved at 2 mm, and stored at 4°C. Soil samples were used to determine soil water content and microbial  
143 respiration. In addition, nematodes were extracted from the soil samples in spring and summer of 2017.

144

#### 145 v. The Bait Lamina Test

146 Feeding activity of soil invertebrates was surveyed using the bait lamina test (Terra Protecta GmbH, Berlin,  
147 Germany), which presents a commonly used rapid ecosystem function assessment method<sup>36</sup>. The test  
148 uses rigid PVC sticks (1 mm x 6 mm x 120 mm) with 16 holes of 1.5 mm diameter in 5 mm distance. Original  
149 sticks were filled with a bait substrate consisting of 70% cellulose powder, 27% wheat bran, and 3%  
150 activated carbon, which was prepared according to the recommendations of Terra Protecta. The bait  
151 substrate is primarily consumed by mites, collembolans, nematodes, enchytraeids, millipedes, and  
152 earthworms, whereas microbial activity plays a minor role in bait loss<sup>37-40</sup>. The sticks were inserted  
153 vertically into the soil with the topmost hole just below the ground surface. To avoid damaging the sticks,



154 a steel knife was used to prepare the ground prior to insertion. Five sticks were used per plot to account  
155 for spatial heterogeneity<sup>41</sup>. For each sampling campaign, the bait lamina sticks were removed from the  
156 soil after three weeks of exposure and evaluated directly in the field. Bait consumption was recorded as  
157 empty (1), partly empty (0.5), or filled (0). Thus, soil invertebrate feeding activity could range from 0 to 16  
158 (maximum feeding activity). Mean bait consumption per plot was calculated prior to statistical analyses.

159

160 vi. Microbial biomass and activity

161 An O<sub>2</sub>-microcompensation system was used to measure the respiratory response of soil microorganisms<sup>42</sup>.  
162 First, basal respiration was determined as a measure of soil microbial activity ( $\mu\text{l O}_2 \text{ h}^{-1} \text{ g}^{-1}$  soil dry weight).  
163 Second, the maximal respiratory response after the addition of glucose (4 mg g<sup>-1</sup> dry weight soil, solved in  
164 1.5 ml distilled water) allowed us to determine microbial biomass ( $\mu\text{g Cmic g}^{-1}$  soil dry weight)<sup>43</sup>.

165

166 vii. Nematode analysis

167 Nematode extraction was conducted with a modified Baermann method<sup>44</sup>. Approximately 25 g of soil per  
168 plot were transferred to plastic vessels with a milk filter and a fine gaze (200  $\mu\text{m}$ ) at the bottom and placed  
169 in water-filled funnels. More water was added to saturate the soil samples and to ensure a connected  
170 water column throughout the sample and the funnel. Hence, nematodes migrated from the soil through  
171 the milk filter and the gaze into the water column and gravitationally-settled at the bottom of a closed  
172 tube connected to the funnel. After 72 h at 20°C, the nematodes were transferred to a 4% formaldehyde  
173 solution. Nematodes were counted at 100x magnification using a Leica DMI 4000B light microscope.  
174 Identification was conducted at 400x magnification. For identification, sediment material from the bottom  
175 of each sample vial was extracted with a 2 ml plastic pipette and examined in temporary mounted

176 microscope slides. At least 100 well-preserved specimens (if available in the sample) were randomly  
177 selected and identified to genus (adults and most of the juveniles) or family level (juveniles), following  
178 Bongers (1988)<sup>45</sup>. Nematode taxa were then arranged into trophic groups (bacteria-, fungal- and plant-  
179 feeders, omnivores and predators)<sup>46,47</sup>. Due to low densities, omnivorous and predatory nematodes were  
180 grouped into a combined feeding type for most analyses. Nematodes were also ordered according to the  
181 colonization-persistence gradient (c-p values)<sup>48,49</sup>. The colonizer-persistence scale classifies nematode  
182 taxa based on their life history strategy (i.e. r or K strategists). Cp-1 taxa are distinguished by their short  
183 generation cycles and high fecundity. They mainly feed on bacteria. Cp-2 taxa have longer generation  
184 times, lower fecundity and consist of bacterivores and fungivores<sup>50</sup>. Both are categorized as r-strategists.  
185 Cp-3 to cp-5 are classified as K-strategist nematodes with longer generation times, higher trophic feeding  
186 levels and increasing sensitivity against disturbances<sup>50</sup>. The c-p-values can be used to calculate the  
187 Maturity Index (MI) as weighted means of nematode families assigned to c-p-values. It is used to describe  
188 soil health and as an indicator of overall food web complexity<sup>48,49</sup>.

$$189 \quad MI = \sum_{i=1}^n \binom{n}{k} v(i) * f(i)$$

190 with  $v(i)$  being the c-p-value of a taxon  $i$  and  $f(i)$  being the frequency of that taxon in a sample.

191 Furthermore, nematode taxa were assigned to functional guilds according to Ferris et al. (2001)<sup>50</sup>, which  
192 then served as a basis to calculate additional indices. Functional guilds refer to the following trophic  
193 groups: bacterial feeders ( $Ba_x$ ), fungal feeders ( $Fu_x$ ), omnivores ( $Om_x$ ), and carnivores ( $Ca_x$ ). Associated  
194 numbers (i.e., the  $x$  of the respective trophic group) are again referring to the c-p values described above.  
195 The Enrichment Index (EI) indicates the responsiveness of the opportunistic bacterial ( $Ba_1$  and  $Ba_2$ ) and  
196 fungal feeders ( $Fu_2$ ) to food web enrichment<sup>50</sup> and is calculated as follows:

$$197 \quad EI = 100 \times \left[ \frac{e}{e+b} \right]$$

198 with  $e$  as weighted frequencies of  $Ba_1$  and  $Fu_2$  and  $b$  as weighted frequencies of  $Ba_2$  and  $Fu_2$  nematodes<sup>50</sup>.

199 The Channel Index (CI) reflects the nature of decomposition channels through the soil food web. High  
200 values indicate a predominant decomposition pathway of organic matter dominated by fungal-feeding  
201 nematodes, whereas low values refer to bacterial-dominated decomposition pathways<sup>50</sup>.

$$202 \quad CI = 100 \times \left[ 0.8 \times \frac{Fu_2}{3.2 \times Ba_1 + 0.8 \times Fu_2} \right]$$

203 with 0.8 and 3.2 representing enrichment weightings for  $Fu_2$  and  $Ba_1$  nematodes<sup>50</sup>. The Structure Index  
204 (SI) provides information about the complexity of the soil food web. A highly structured food web with a  
205 high SI suggests ecosystem stability, while low values imply environmental disturbance<sup>50</sup>.

$$206 \quad SI = 100 \times \left[ \frac{s}{s+b} \right]$$

207 with  $s$  calculated as the weighted frequencies of  $Ba_3$ - $Ba_4$ ,  $Fu_3$ - $Fu_4$ ,  $Ca_3$ - $Ca_5$  and  $Om_3$ - $Om_5$  nematodes, and  
208  $b$  representing the weighted frequencies of  $Ba_2$  and  $Fu_2$  nematodes<sup>50</sup>.

209 By plotting the Enrichment Index (EI) against the Structure Index (SI) we obtained a faunal profile that  
210 indicates, whether the nematode community can be described as basal and stressed or as structured,  
211 enriched and stable<sup>50</sup>.

212

#### 213 i. Statistical analyses

214 Linear mixed-effects models were used to analyse the effects of drought, NPK fertilization, season, and  
215 their interactions on invertebrate feeding activity, microbial activity, and microbial biomass using the R-  
216 package “*nlme*”<sup>51</sup>. The random intercept of the model was structured with plots nested within blocks,  
217 nested within year (year as a categorical factor). To account for repeated measurements within plots, we  
218 compared first-order autoregressive and compound symmetry covariance structures based on the Akaike

219 information criterion (AIC). As differences between AIC values were lower than 2, the simplest covariance  
220 structure (i.e. compound symmetry) was used. Based on the importance of soil water content for  
221 microbial activity and biomass<sup>52</sup>, soil water content was added as an additional explanatory variable to  
222 the linear mixed-effects models (Tables S3-S4, Figs. S4-S5). As we were expecting a strong relation  
223 between aboveground plant biomass and microbial biomass<sup>53</sup>, additional linear mixed-effects models  
224 were used to test the influence of plant biomass on microbial biomass (Table S5, Fig. S6). Model  
225 assumptions were checked by visually inspecting residuals for homogeneity and Pearson residuals for  
226 normality. To meet the assumptions of the model, invertebrate feeding activity and microbial activity  
227 were log-transformed ( $\log(x+1)$ ). In addition, linear mixed-effects models were used to assess the effects  
228 of drought, NPK fertilization, season (spring and summer 2017), and their interactions on nematode  
229 indices, i.e. Enrichment Index, Structure Index, Channel Index, and Maturity Index. A random intercept  
230 with plots nested within block was included in the models. We accounted for repeated measurements  
231 within plots by using a compound symmetry covariance structure, which fitted the data better than a first-  
232 order autoregressive covariance structure based on the Akaike information criterion. To evaluate model  
233 variation explained by fixed and random effects, marginal and conditional  $R^2$  were calculated using the  
234 “*MuMIn*” package<sup>54</sup>; marginal  $R^2$  represents model variation explained by fixed effects in the final model  
235 and conditional  $R^2$  represents model variation explained by both random and fixed effects. Furthermore,  
236 generalized mixed-effects models (GLMM) were used to assess the effects of drought, NPK fertilization,  
237 season (spring and summer 2017), and their interactions on nematode richness, total density (i.e. total  
238 number of individuals in the nematodes community) and the abundance of each trophic group (i.e.  
239 percentage of individuals in each trophic group). Nematode richness and total density of nematodes were  
240 modelled with Poisson distribution, while the trophic groups were modelled with Binomial distribution.  
241 The random intercept of the model was structured with plots nested within blocks. To account for over-  
242 dispersion, an observation-level random effect was used in the model with omnivorous and predatory

243 nematodes as a response variable. GLMM models were also used to assess the effects of drought, NPK  
244 fertilization, and their interactions on nematode functional guilds and cp-groups (Table S6) using Binomial  
245 distribution. The random intercept of the model was structured with plots nested within blocks, nested  
246 within sampling (sampling as a categorical factor). GLMM models were performed using the “*lme4*”  
247 package<sup>55</sup>. Figures are based on mixed-effects model fits extracted using the package “*ggeffects*”<sup>56</sup>. All  
248 statistical analyses were conducted using R version 3.4.2<sup>57</sup>.

## 249 Results

### 250 i. Soil microbial responses

251 Soil microbial activity ranged from 0.7 to 5.1  $\mu\text{l O}_2 \text{ h}^{-1} \text{ g}^{-1}$  dry weight soil with an average of 1.7  $\mu\text{l O}_2 \text{ h}^{-1}$   
252 per g dry weight soil across all measurements. We could not detect a significant effect of the drought or  
253 the fertilization treatment on soil microbial activity (Fig. 1a). However, microbial respiration was  
254 significantly affected by season, with lowest activity in summer and highest activity in winter (Table 1; Fig.  
255 1b). In addition, we found a positive relation between microbial activity and soil water content ( $F_{1,111} =$   
256 170.83,  $p < 0.001$ ; Table S3) that was independent of the drought and fertilization treatment (Fig. S4).

257 Soil microbial biomass ranged from 168.0 to 979.8  $\mu\text{g Cmic g}^{-1}$  dry weight soil with an average of 530.6  $\mu\text{g}$   
258  $\text{Cmic g}^{-1}$  dry weight soil across all measurements. Overall, soil microbial biomass increased significantly  
259 with NPK fertilization (Fig. 1c). Microbial biomass was also significantly affected by season with lowest  
260 biomass in summer and highest biomass in fall (Fig. 1d, Table 1). Furthermore, fertilization and soil water  
261 content interactively affected microbial biomass ( $F_{1,111} = 10.60$ ,  $p = 0.002$ ; Table S4); while microbial  
262 biomass increased with higher soil water content under ambient conditions, it slightly decreased with  
263 higher soil water content on plots with NPK fertilization (Fig. S5). In addition, soil microbial biomass  
264 increased significantly with aboveground plant biomass ( $F_{1,59} = 8.81$ ,  $p = 0.004$ ; Table S6; Fig. S5).

265

### 266 ii. Nematode responses

267 Neither total nematode density nor richness were significantly affected by any of the experimental  
268 treatments (Fig. 2a-b; Table 2); we could only detect significant differences between spring and summer  
269 (Fig. S7a-b). Among the nematode trophic groups, only bacteria-feeders were significantly increased by  
270 the fertilization treatment (Fig. 2c), which was mainly due to a significant increase of the r-strategic Ba<sub>1</sub>-

271 nematodes ( $\chi^2 = 4.57$ ,  $p = 0.032$ ; Fig. S8a). In addition, bacteria-feeders were highly abundant in summer  
272 (Fig. S7c). Plant-feeders were affected by the interactive effects of fertilization and season: while  
273 fertilization favoured plant-feeding nematodes in spring, it had a negative effect in summer (Fig. 2d and  
274 S7d). The combined group of omnivorous and predatory nematodes marginally significantly decreased  
275 under drought and NPK fertilization (Fig. 2e), with a stronger negative effect of fertilization in spring (Fig.  
276 S7e). Fungal-feeders were not significantly affected by any of the treatments (Fig. 2f). A closer look at  
277 changes in the nematode community composition revealed that cp2 plant-feeding nematodes increased  
278 with drought ( $\chi^2 = 6.65$ ,  $p = 0.0099$ ; Fig. S9c; Table S6), whereas nematodes with higher c-p values, in detail  
279 Fu<sub>3</sub>-nematodes ( $\chi^2 = 4.97$ ,  $p = 0.026$ ; Fig. S8e), Om<sub>4</sub>-nematodes (marginally;  $\chi^2 = 3.80$ ,  $p = 0.051$ ; Fig. S8g),  
280 cp3 (marginally;  $\chi^2 = 2.74$ ,  $p = 0.098$ ; Fig. S9d), and cp4-nematodes ( $\chi^2 = 7.83$ ,  $p = 0.0051$ ; Fig. S9f) decreased  
281 significantly in response to fertilization.

282 While the Enrichment Index increased marginally significantly under drought conditions (Table 2; Fig. 3a),  
283 the Structure Index and the Maturity Index were marginally significantly decreased by drought (Fig. 3b-c).  
284 Fertilization increased the importance of the bacterial decomposition channel as indicated by a marginally  
285 significant decrease of the Channel Index (Fig. 3d). In addition, fertilization decreased nematode  
286 complexity as indicated by a significant decrease of the Structure Index and Maturity Index. (Fig. 3b-c).  
287 Furthermore, plotting the EI-SI profile of the nematode community grouped by the different treatment  
288 combinations depicted that while some of the control and drought plots could be found in quadrant C  
289 (undisturbed, moderate enrichment, structured food web), nearly all NPK and NPK x drought plots were  
290 located in quadrant D (stressed, depleted, degraded food web) or in quadrant A (high disturbed, enriched,  
291 disturbed food web) (Fig. 3e).

292

293 iii. Soil invertebrate feeding responses

294 Mean soil invertebrate feeding activity per plot ranged from 0 to 60% of consumed bait substrate with an  
295 average of 11% bait consumption. Feeding activity was significantly affected by an interactive effect of  
296 drought x fertilization; overall, fertilization decreased invertebrate feeding activity at ambient  
297 precipitation, but had no significant effect under drought conditions (Fig. 4a). These treatment effects  
298 were consistent across seasons (no treatment x season interaction), however, the level of soil invertebrate  
299 feeding activity varied strongly between seasons and tended to be highest in summer and strongly  
300 decreased in winter (Table 1; Fig. 4b).



301 **Table 1. Results of linear mixed-effects models for the effects of drought, NPK fertilization, season, and their interactions on soil invertebrate**  
 302 **feeding activity, soil microbial activity, and soil microbial biomass.** A random intercept with plots nested within blocks, which were nested within  
 303 year was added to the model. A compound symmetry covariance structure was used to account for repeated measurements within plots. Marginal  
 304 R<sup>2</sup>: model variation explained by fixed effects; conditional R<sup>2</sup>: model variation explained by both fixed and random effects. Logarithmic  
 305 transformations were used for soil invertebrate feeding activity and soil microbial activity. NPK = NPK fertilization. \* p < 0.05; \*\* p < 0.01; \*\*\* p <  
 306 0.001.

| Response Variables                       | Drought                  | NPK                      | Season                    | Drought<br>x NPK         | Drought x<br>Season       | NPK x<br>Season           | Drought x<br>NPK x<br>Season | R <sup>2</sup> % |                    |
|------------------------------------------|--------------------------|--------------------------|---------------------------|--------------------------|---------------------------|---------------------------|------------------------------|------------------|--------------------|
|                                          | <i>F-value</i><br>(1,27) | <i>F-value</i><br>(1,27) | <i>F-value</i><br>(3,108) | <i>F-value</i><br>(1,27) | <i>F-value</i><br>(3,108) | <i>F-value</i><br>(3,108) | <i>F-value</i><br>(3,108)    | <i>marginal</i>  | <i>conditional</i> |
| <b>Microbial activity</b>                | 0.78                     | 2.71                     | 31.02***                  | 0.02                     | 1.07                      | 0.30                      | 0.28                         | 37               | 49                 |
| <b>Microbial biomass</b>                 | 2.25                     | 35.48***                 | 3.95*                     | 0.22                     | 1.55                      | 0.92                      | 0.36                         | 8.4              | 80                 |
| <b>Invertebrate<br/>feeding activity</b> | 22.65***                 | 22.60***                 | 22.78***                  | 9.17**                   | 0.19                      | 0.36                      | 0.38                         | 44               | 49                 |

307

308 **Table 2. Chi-squared values ( $\chi^2$ ) of the generalized mixed-effects models for the effects of drought,**  
 309 **fertilization, season (spring and summer 2017), and their interaction on soil nematode density and**  
 310 **richness using Poisson distribution and percentage of each nematode trophic group using Binomial**  
 311 **distribution.** Plots nested within blocks served as a random intercept in the model. NPK = annual NPK  
 312 fertilization. (\*)  $p < 0.1$ ; \*  $p < 0.05$ ; \*\*\*  $p < 0.001$

| Nematode response variable | Drought  | NPK      | Season    | Drought x NPK | Drought x Season | NPK x Season | Drought x NPK x Season |
|----------------------------|----------|----------|-----------|---------------|------------------|--------------|------------------------|
|                            | $\chi^2$ | $\chi^2$ | $\chi^2$  | $\chi^2$      | $\chi^2$         | $\chi^2$     | $\chi^2$               |
| Total density              | 0.51     | 2.51     | 118.15*** | 0.66          | 0.80             | 0.47         | 0.79                   |
| Richness                   | 0.14     | 0.38     | 21.47***  | 0.13          | 0.05             | 0.06         | 0.01                   |
| Plant feeders              | 0.24     | 1.22     | 12.53***  | 0.53          | 3.24(*)          | 11.17***     | 1.10                   |
| Fungal feeders             | 1.15     | 0.74     | 0.57      | 0.06          | 3.24(*)          | 1.87         | 0.61                   |
| Bacteria feeders           | 0.26     | 4.76*    | 15.64***  | 0.71          | 2.05             | 0.25         | 0.95                   |
| Predators/Omnivores        | 3.53(*)  | 3.50(*)  | 0.80      | 2.16          | 1.53             | 5.63*        | 0.07                   |

313

314

315

316

317

318

319

320

321 **Table 3. Results of linear mixed effects models for the effects of drought, fertilization, season (spring and summer 2017), and their interaction**  
 322 **on soil nematode indices.** Plots nested within blocks served as a random intercept in the model. A compound symmetry covariance structure was  
 323 used to account for repeated measurements within plots. Marginal R<sup>2</sup>: model variation explained by fixed effects; conditional R<sup>2</sup>: model variation  
 324 explained by both fixed and random effects. NPK = annual NPK fertilization. (\*) p < 0.1; \* p < 0.05; \*\* p < 0.01; \*\*\* p < 0.001

325

| Nematode response variable | Drought               | NPK                   | Season                | Drought x NPK         | Drought x Season      | NPK x Season          | Drought x NPK x Season | R <sup>2</sup> % |                    |
|----------------------------|-----------------------|-----------------------|-----------------------|-----------------------|-----------------------|-----------------------|------------------------|------------------|--------------------|
|                            | <i>F-value (1,12)</i> | <i>F-value (1,12)</i> | <i>F-value (1,16)</i> | <i>F-value (1,12)</i> | <i>F-value (1,16)</i> | <i>F-value (1,16)</i> | <i>F-value (1,16)</i>  | <i>marginal</i>  | <i>conditional</i> |
| <b>Enrichment Index</b>    | 3.30 (*)              | 0.84                  | 0.07                  | 0.00                  | 0.03                  | 0.05                  | 0.17                   | 9.4              | 18                 |
| <b>Structure Index</b>     | 4.95 (*)              | 6.65*                 | 0.02                  | 0.32                  | 1.70                  | 0.51                  | 0.53                   | 23               | 29                 |
| <b>Channel Index</b>       | 1.60                  | 3.98 (*)              | 1.42                  | 0.04                  | 1.62                  | 0.00                  | 0.11                   | 19               | 50                 |
| <b>Maturity Index</b>      | 5.07 (*)              | 10.18**               | 0.00                  | 0.52                  | 1.99                  | 0.21                  | 0.72                   | 28               | 34                 |

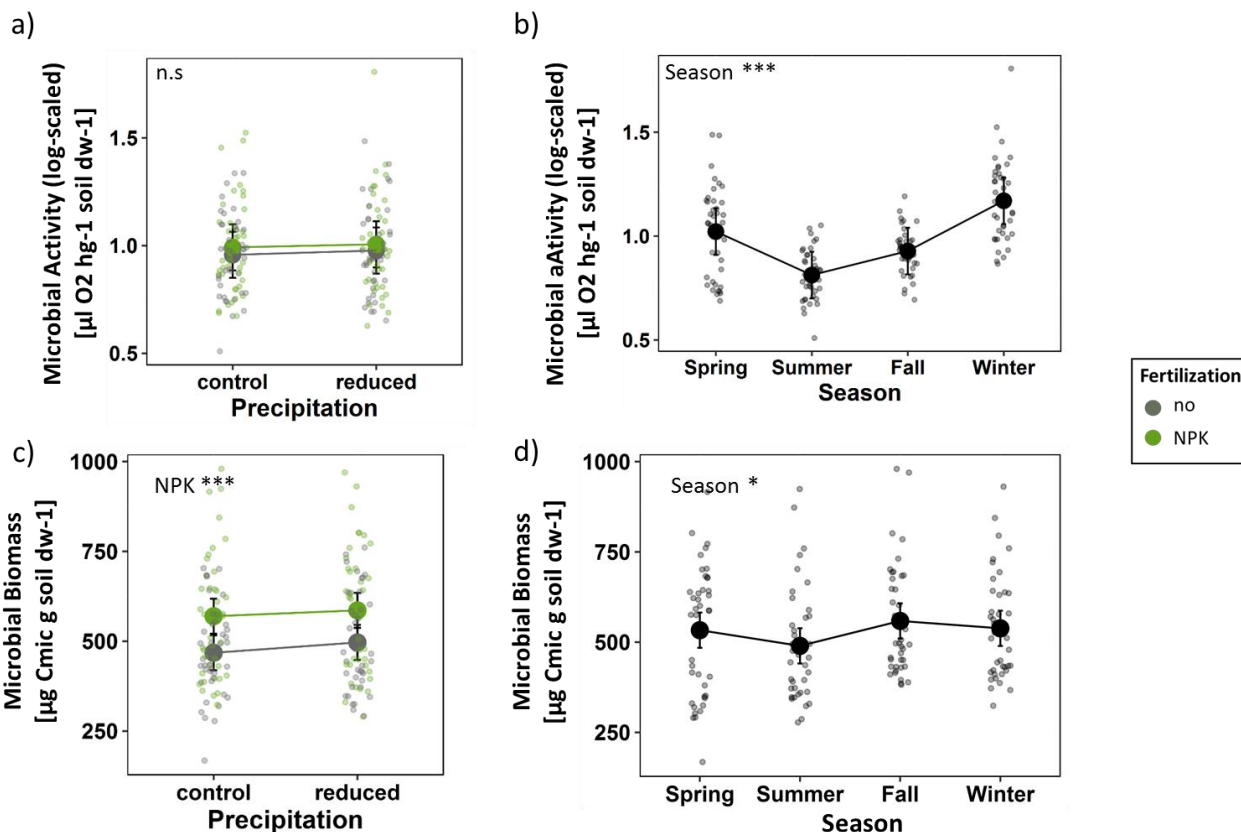

326

327 **Figure 1. The effects of drought, fertilization, and season on soil microbial variables based on mixed**

328 **effects model fits for each treatment. (a) Combined treatment effects across all seasons and (b) seasonal**

329 **effects on soil microbial activity (log-scaled). (c) Combined treatment effects across all seasons and (d)**

330 **seasonal effects on soil microbial biomass. Error bars indicate 95% confidence intervals. Grey = no NPK**

331 **fertilization; green = NPK fertilization. n.s. = not significant; \*  $p < 0.05$ ; \*\*\*  $p < 0.001$**

332

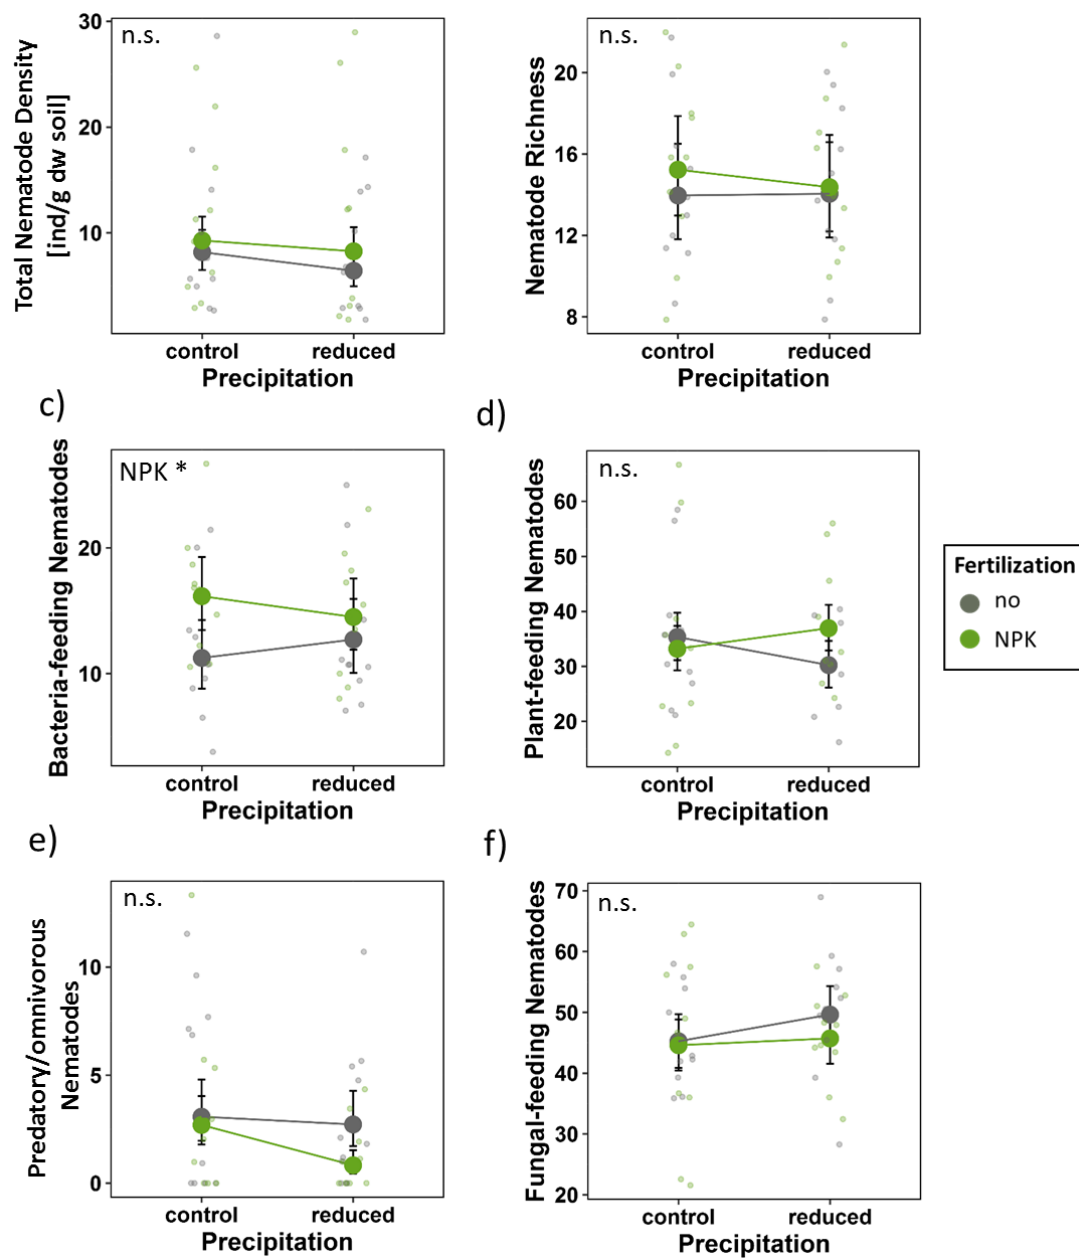

333

334 **Figure 2. The effects of drought and fertilization on nematode response variables based on mixed**

335 **effects model fits for each treatment. (a) Total nematode density per g dry weight soil; (b) nematode**

336 **taxon richness; percentage of (c) bacteria-feeding nematodes; (d) plant-feeding nematodes; (e) fungal-**

337 **feeding nematodes; and (f) predatory- and omnivorous nematodes. Error bars indicate 95% confidence**

338 **intervals. Grey = no NPK fertilization; green = NPK fertilization. Both seasons (spring and summer 2017)**

339 **are included (see Fig. S7 for seasonal effects). n.s. = not significant; \* p < 0.05**

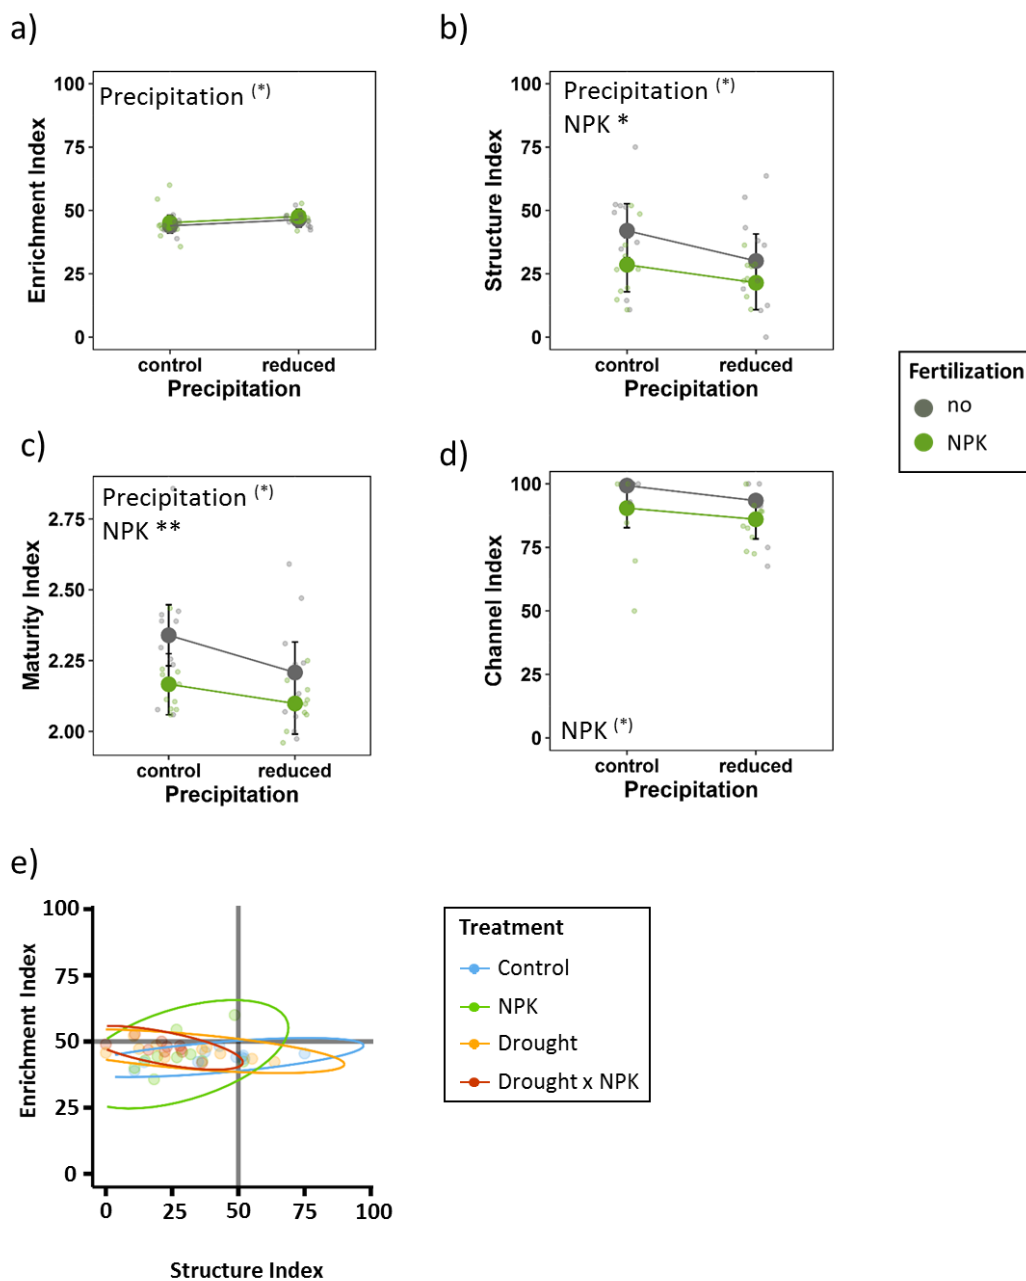

340  
341 **Figure 3. The effects of drought and fertilization on soil nematode indices based on mixed effects model**  
342 **fits for each treatment.** (a) Enrichment Index; (b) Structure Index; (c) Maturity Index, and (d) Channel  
343 Index. Error bars indicate 95% confidence intervals. Grey = no NPK fertilization; green = NPK fertilization.  
344 (e) Enrichment Index (EI) and Structure Index (SI) trajectories for all plots according to the treatment  
345 combinations. Blue = control; green = NPK fertilization; yellow = drought; red = drought x NPK. Ellipses  
346 group treatments. Two seasons (spring and summer 2017) were included. (\*)  $p < 0.1$ ; \*  $p < 0.05$

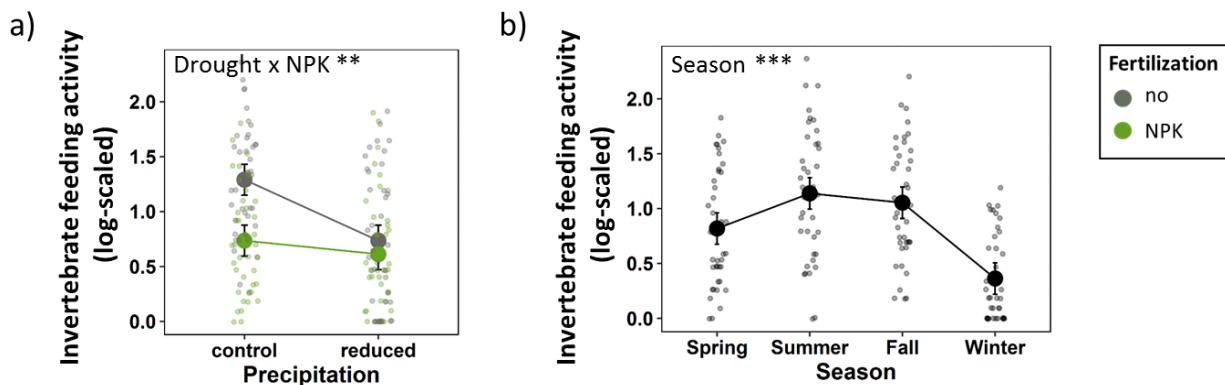

347

348 **Figure 4. The effects of drought, NPK fertilization, and season on soil invertebrate feeding activity (log-**

349 **scaled) based on mixed-effects model fits for each treatment. (a) Combined treatment effects across all**

350 **seasons and (b) seasonal effects. Error bars indicate 95% confidence intervals. Grey = no NPK fertilization;**

351 **green = NPK fertilization. \*\*  $p < 0.01$ ; \*\*\*  $p < 0.001$**

352

353

## 354 Discussion

355 We studied the impacts of two major global change drivers, namely drought and fertilization, and their  
356 interactive effects on soil communities and functions. By investigating the responses of a wide range of  
357 soil organisms across all seasons within a two-year timeframe, we gained a comprehensive picture of how  
358 soil ecosystem functions may be altered in a changing world. Intriguingly, we saw vastly different  
359 responses among trophic levels that were constant across seasons.

360

361 Our first hypothesis, predicting detrimental effects of drought on soil organisms, was confirmed to some  
362 extent: drought reduced soil invertebrate feeding activity and led to a more disturbed soil nematode  
363 community structure, whereas soil microbial activity and biomass were not significantly affected. The  
364 dependency of soil invertebrates on soil moisture content is well documented<sup>58</sup> as is the fact that soil  
365 microfauna is more prone to water stress than bacteria and fungi<sup>59</sup>. The detrimental drought effects on  
366 faunal activity are thus in line with previous studies, which claim that abiotic conditions shape the  
367 performance of the soil faunal community<sup>60</sup>. Microarthropods (mites and collembolans), enchytraeids,  
368 and earthworms are some of the most relevant groups found in the upper soil layer in temperate regions<sup>37</sup>  
369 and are likely to account for most of the feeding activity leading to bait perforation<sup>61,62</sup>. Extreme drought  
370 not only forces them to migrate to deeper soil layers, but also interferes with their reproduction and  
371 development success, which is possibly the reason why they are highly susceptible to drought<sup>63-66</sup>.  
372 Furthermore, drought conditions entail drier food sources for detritivores, which are more difficult to  
373 digest<sup>41</sup>.

374



375 In line with our expectations, drought was also responsible for (moderate) shifts in nematode indices. The  
376 environmental conditions were changed towards an enriched, more disturbed, less structured system,  
377 with a higher proportion of opportunistic nematodes. Already at ambient precipitation levels, the guilds  
378 of the opportunistic Fu<sub>2</sub>- and Ba<sub>2</sub>-nematodes accounted for the highest shares at our experimental site,  
379 indicating a basal food web that is capable to cover a wide ecological amplitude and is already adapted to  
380 some environmental stress<sup>50</sup>. The positive response of the Enrichment Index to drought suggests mortality  
381 at higher trophic levels, which subsequently promoted nutrient enrichment and gave further rise to  
382 opportunistic nematodes<sup>50</sup>. Thus, overall, drought led to simplified trophic structures of the nematode  
383 community.

384

385 In contrast to our initial hypothesis, soil microbial activity and biomass were not affected by the drought  
386 treatment. This was unexpected given the intensity of the drought treatment applied in the experiment  
387 (precipitation was reduced by 55% during the entire study period) and the fact that most soil microbes  
388 are strongly dependent on high soil moisture levels<sup>52,67</sup>. However, our results indicate that drought may  
389 not be a strong determinant of soil microbial activity and biomass at the study site. This is in line with  
390 Pailler et al. (2014)<sup>68</sup>, who found microbial functional responses to be robust against drought. In spite of  
391 the negligible responses to the drought treatment, we could reveal that soil water content explained a  
392 significant proportion of the variability in microbial activity, yet irrespective of the treatments. This  
393 suggests that microorganisms residing in the upper soil layer are highly depending on soil moisture levels  
394 and must therefore be able to sustain drought periods, for instance, through physiological modifications.  
395 Such adaptations may comprise an adjustment of internal water potential, sporulation, or production of  
396 exopolysaccharides that provide protection against exsiccation<sup>69,70</sup>. Apart from the resilience of the  
397 microbial community against experimental drought, we observed distinct variation of microbial activity  
398 and biomass across seasons. This provides evidence that temporal environmental variability is a strong

399 predictor of species activity and emphasizes the dependency of soil organisms on seasonal patterns<sup>71-73</sup>.  
400 We therefore infer that seasonal fluctuations in natural precipitation may have led to acclimatization of  
401 the microbial communities to drought periods as they are part of their climatic history<sup>74,75</sup>, which may  
402 explain the weak effects of the experimentally induced drought.

403

404 The responses of soil biota were again ambiguous with regard to our second hypothesis, in which we  
405 expected fertilization to promote the activity of soil biota. Consistent with our hypothesis, soil microbial  
406 biomass increased under fertilization. Soil invertebrate feeding activity, however, substantially declined  
407 under elevated nutrient supply, questioning the universal validity of our initial hypothesis. The  
408 pronounced responsiveness of soil microbial biomass to NPK fertilization is in line with similar studies  
409 reporting positive effects of nitrogen fertilization on microbial biomass and changes in microbial  
410 community structure and function<sup>76,77</sup>. Fertilization certainly enhanced nutrient availability, resulting in  
411 higher yields of aboveground plant biomass (Berger et al., in prep.), which is often accompanied by an  
412 expanded root system<sup>28</sup>. Subsequently, this increases the release of organic compounds into the soil<sup>78</sup>,  
413 providing substrates that support the growth of microbial communities towards higher population  
414 densities<sup>53</sup>.

415

416 Also nematode indices were highly responsive to NPK fertilization, resulting in a less structured and more  
417 disturbed system with an enhanced bacteria-driven decomposition pathway. The latter was additionally  
418 supported by a strong increase in bacteria-feeding nematodes (especially Ba<sub>1</sub>) and an equally strong  
419 decrease in fungal-feeding nematodes (Fu<sub>3</sub>) under fertilization, indicating that fertilization had  
420 detrimental effects on soil fungi. This is in line with the general notion that fertilization favours bacteria-  
421 dominated decomposition<sup>18,27,50,79</sup>. The simplification of the nutrient-enriched soil food web is also

422 reflected by declines of the omnivorous nematodes (Om<sub>4</sub>) and the cp3 and cp4 nematodes, which consist  
423 of long-living, pollutant sensitive, rather immobile organisms that are prone to environmental stress<sup>49</sup>.  
424 When linking these changes reported for the nematode indices to the responses of the microbial  
425 community, our results suggest that fertilization promoted the growth of bacteria (simultaneously  
426 repressing fungi), which then accounted for a strong increase in microbial biomass. As a result, this  
427 restructuring of the microbial community may thus have provided the basis for the observed increase in  
428 bacteria-feeding nematodes and some of the shifts in nematode indices.

429

430 Current evidence for soil invertebrate responses to fertilization is equivocal. Several studies reported an  
431 enhancing effect of fertilization on soil invertebrate activity and diversity<sup>80,81</sup>, whereas others revealed no  
432 such effects<sup>16,82</sup>, or recorded declines in soil fauna abundances and diversity after fertilizer application<sup>37</sup>.  
433 Most likely, the diminished feeding activity of soil invertebrates can be explained by alterations of soil  
434 physicochemical properties. Fertilization often results in reduced soil pH, which is negatively correlated  
435 with the abundance of most soil invertebrates<sup>83,84</sup>. Especially earthworms, which represent a significant  
436 part of soil invertebrate biomass<sup>85</sup>, have been reported to decline noticeably in numbers under reduced  
437 soil pH<sup>86</sup>. In addition to this direct effect, the observed shifts in nematode indices could provide evidence  
438 for possible indirect effects on invertebrate feeding activity: as fungi seemed to be substantially reduced  
439 by fertilization, microarthropods like Collembola and Oribatid mites, which are strongly depending on  
440 fungi, may thereby be deprived of their main food source<sup>82,87</sup>. As a consequence, soil microarthropods  
441 may have declined in their abundances, thus limiting their possible contribution to bait perforation.  
442 Overall, environmental constraints, such as reduced soil pH in combination with altered energy channels  
443 and simplified food web structures, outweighed potential positive bottom-up effects through enhanced  
444 plant growth, which we expected to find.

445

446 Prior studies emphasized the importance of interactive effects of global change drivers as they will  
447 profoundly alter ecosystem functions and services<sup>7,88</sup>. Accordingly, our third hypothesis predicted  
448 fertilization to reinforce drought effects, resulting in reduced soil water content and thus aggravated living  
449 conditions for soil organisms. Indeed, drought and fertilization interacted significantly in restraining soil  
450 invertebrate feeding activity, partially supporting our hypothesis. However, as discussed above,  
451 fertilization obviously created an unfavourable environment for most soil invertebrates at our site.  
452 Although both global change drivers individually decreased soil invertebrate feeding activity, the  
453 interaction, however, did not result in further declines. We therefore conclude that the combined effects  
454 may have led to a distinct restructuring of the soil faunal community by promoting species better adapted  
455 to adverse conditions, and thus revealing no measurable change in net effects. Since the combined global  
456 change drivers are likely to modify aboveground plant communities<sup>89-91</sup>, alterations in the quality of  
457 aboveground litter inputs can be expected. Leaf litter quality, in turn, affects soil fauna and might  
458 therefore be responsible for reshaping the faunal community<sup>92,93</sup>. With the methods applied in our study,  
459 however, we can only speculate about potential changes in the soil faunal community composition. This  
460 highlights the need for future research to detect which specific groups are responsible for bait perforation.  
461 This could be done, for instance, by exposing bait lamina strips with a labelled substrate under controlled  
462 laboratory conditions<sup>94,95</sup>. Building on that, the abundances of the most important groups of soil  
463 organisms could be monitored in the field, while being exposed to different global change drivers.

464

465 In contrast to the invertebrate feeding activity, microbial activity was not significantly affected by the  
466 interaction of the two global change drivers. Moreover, we could not detect any interactive effects on  
467 nematode indices or nematode groups. This illustrates the robustness of a large portion of the soil

468 community to interactive global change effects, which might therefore be able to buffer prospective  
469 global change effects to a certain extent.

470

471 In conclusion, the main groups of soil organisms investigated in the present study responded differently  
472 to the main and interacting effects of global change drivers. Soil invertebrate activity was strongly  
473 impaired by both global change drivers and their interaction, while microbial biomass benefited from  
474 enhanced nutrient availability, and microbial activity was surprisingly unaffected by all treatments.  
475 Despite the strong seasonal dynamics of temperate regions, these treatment effects remained constant  
476 across all seasons within two years. Notably, nematode indices pointed to changes in the state of the  
477 ecosystem, shifting towards simplified and more disturbed systems under drought and especially under  
478 fertilization that mostly facilitated opportunistic species. We could show that soil biota differ considerably  
479 in their sensitivity to global change drivers and in their seasonal dynamics – also highlighting the  
480 importance of integrating seasonal effects into experimental frameworks. This may lead to far-reaching  
481 alterations of crucial ecosystem processes, since decomposition and nutrient cycling are driven by the  
482 interdependent concurrence of soil microbial and faunal activities<sup>40</sup>. By covering a range of different  
483 taxonomic and trophic levels of soil organisms, we could therefore show that single as well interacting  
484 global change drivers induce complex changes in soil food webs and functions.

485

## 486 Acknowledgements

487 We thank the staff of the Bad Lauchstädt Experimental Research Station for their help in maintaining the  
488 experimental site, and Alla Kavtea, Tom Künne, and Ulrich Pruschitzki for their support with lab and field  
489 work. Furthermore, we thank the coordination of the International Drought-Net Experiment for providing  
490 protocols and support. Financial support came from the German Centre for Integrative Biodiversity  
491 Research Halle–Jena–Leipzig, funded by the German Research Foundation (FZT 118).

492

## 493 References

- 494 1 Vitousek, P. M. Beyond global warming: ecology and global change. *Ecology* **75**, 1861-1876 (1994).  
495 2 Steffen, W. *et al.* *Global change and the earth system: a planet under pressure*. (Springer Science  
496 & Business Media, 2006).
- 497 3 IPCC, T. P. S. B., 2007. *Climate Change 2007. The Physical Science Basis. Contribution of Working*  
498 *Group I to the Fourth Assessment Report of the Intergovernmental Panel on Climate Change*  
499 *[Solomon, S., D. Qin, M. Manning, Z. Chen, M. Marquis, K.B. Averyt, M. Tignor and H.L. Miller*  
500 *(eds.)*. Vol. 4 (Cambridge University Press, Cambridge, United Kingdom and New York, NY, USA.,  
501 2007).
- 502 4 Galloway, J. N. *et al.* Transformation of the nitrogen cycle: recent trends, questions, and potential  
503 solutions. *Science* **320**, 889-892 (2008).
- 504 5 Lamarque, J. F. *et al.* Assessing future nitrogen deposition and carbon cycle feedback using a  
505 multimodel approach: Analysis of nitrogen deposition. *Journal of Geophysical Research:*  
506 *Atmospheres* **110** (2005).
- 507 6 Wang, R. *et al.* Significant contribution of combustion-related emissions to the atmospheric  
508 phosphorus budget. *Nature Geoscience* **8**, 48 (2015).
- 509 7 Eisenhauer, N., Cesarz, S., Koller, R., Worm, K. & Reich, P. B. Global change belowground: impacts  
510 of elevated CO<sub>2</sub>, nitrogen, and summer drought on soil food webs and biodiversity. *Global Change*  
511 *Biology* **18**, 435-447 (2012).
- 512 8 De Vries, F. T. *et al.* Land use alters the resistance and resilience of soil food webs to drought.  
513 *Nature Climate Change* **2**, 276-280 (2012).
- 514 9 Oliver, M. A. & Gregory, P. Soil, food security and human health: a review. *European Journal of*  
515 *Soil Science* **66**, 257-276 (2015).
- 516 10 Wall, D. H., Nielsen, U. N. & Six, J. Soil biodiversity and human health. *Nature* (2015).
- 517 11 Orchard, V. A. & Cook, F. Relationship between soil respiration and soil moisture. *Soil Biology and*  
518 *Biochemistry* **15**, 447-453 (1983).
- 519 12 Baldrian, P., Merhautová, V., Petránková, M., Cajthaml, T. & Šnajdr, J. Distribution of microbial  
520 biomass and activity of extracellular enzymes in a hardwood forest soil reflect soil moisture  
521 content. *Applied Soil Ecology* **46**, 177-182 (2010).
- 522 13 Riutta, T., Clack, H., Crockatt, M. & Slade, E. M. Landscape-scale implications of the edge effect on  
523 soil fauna activity in a temperate forest. *Ecosystems* **19**, 534-544 (2016).
- 524 14 Blankinship, J. C., Niklaus, P. A. & Hungate, B. A. A meta-analysis of responses of soil biota to global  
525 change. *Oecologia* **165**, 553-565 (2011).
- 526 15 Hueso, S., García, C. & Hernández, T. Severe drought conditions modify the microbial community  
527 structure, size and activity in amended and unamended soils. *Soil Biology and Biochemistry* **50**,  
528 167-173 (2012).
- 529 16 Lindberg, N., Engtsson, J. B. & Persson, T. Effects of experimental irrigation and drought on the  
530 composition and diversity of soil fauna in a coniferous stand. *Journal of Applied Ecology* **39**, 924-  
531 936 (2002).
- 532 17 Cesarz, S. *et al.* Nematode functional guilds, not trophic groups, reflect shifts in soil food webs  
533 and processes in response to interacting global change factors. *Pedobiologia* **58**, 23-32 (2015).
- 534 18 Kardol, P., Cregger, M. A., Company, C. E. & Classen, A. T. Soil ecosystem functioning under climate  
535 change: plant species and community effects. *Ecology* **91**, 767-781 (2010).
- 536 19 Galantini, J. & Rosell, R. Long-term fertilization effects on soil organic matter quality and dynamics  
537 under different production systems in semiarid Pampean soils. *Soil and Tillage Research* **87**, 72-  
538 79 (2006).

- 539 20 Liu, E. *et al.* Long-term effect of chemical fertilizer, straw, and manure on soil chemical and  
540 biological properties in northwest China. *Geoderma* **158**, 173-180 (2010).
- 541 21 Marinari, S., Masciandaro, G., Ceccanti, B. & Grego, S. Influence of organic and mineral fertilisers  
542 on soil biological and physical properties. *Bioresource Technology* **72**, 9-17 (2000).
- 543 22 Pan, Y. *et al.* Impact of long-term N, P, K, and NPK fertilization on the composition and potential  
544 functions of the bacterial community in grassland soil. *FEMS Microbiology Ecology* **90**, 195-205  
545 (2014).
- 546 23 Treseder, K. K. Nitrogen additions and microbial biomass: A meta-analysis of ecosystem studies.  
547 *Ecology Letters* **11**, 1111-1120 (2008).
- 548 24 Ramirez, K. S., Craine, J. M. & Fierer, N. Nitrogen fertilization inhibits soil microbial respiration  
549 regardless of the form of nitrogen applied. *Soil Biology and Biochemistry* **42**, 2336-2338 (2010).
- 550 25 Dan, W. *et al.* Bacterial community structure and diversity in a black soil as affected by long-term  
551 fertilization. *Pedosphere* **18**, 582-592 (2008).
- 552 26 Li, J. H. *et al.* Effects of nitrogen and phosphorus fertilization on soil carbon fractions in alpine  
553 meadows on the Qinghai-Tibetan Plateau. *PLOS One* **9**, e103266 (2014).
- 554 27 Song, M. *et al.* Responses of soil nematodes to water and nitrogen additions in an old-field  
555 grassland. *Applied Soil Ecology* **102**, 53-60 (2016).
- 556 28 Stevens, C. J. *et al.* Anthropogenic nitrogen deposition predicts local grassland primary production  
557 worldwide. *Ecology* **96**, 1459-1465 (2015).
- 558 29 Liu, L. & Greaver, T. L. A global perspective on belowground carbon dynamics under nitrogen  
559 enrichment. *Ecology Letters* **13**, 819-828 (2010).
- 560 30 Sjursen, H., Michelsen, A. & Jonasson, S. Effects of long-term soil warming and fertilisation on  
561 microarthropod abundances in three sub-arctic ecosystems. *Applied Soil Ecology* **30**, 148-161  
562 (2005).
- 563 31 Craven, D. *et al.* Plant diversity effects on grassland productivity are robust to both nutrient  
564 enrichment and drought. *Phil. Trans. R. Soc. B* **371**, 20150277 (2016).
- 565 32 Borer, E. T. *et al.* Finding generality in ecology: a model for globally distributed experiments.  
566 *Methods in Ecology and Evolution* **5**, 65-73 (2014).
- 567 33 Altermann, M. *et al.* Chernozem—Soil of the Year 2005. *Journal of Plant Nutrition and Soil Science*  
568 **168**, 725-740 (2005).
- 569 34 Yahdjian, L. & Sala, O. E. A rainout shelter design for intercepting different amounts of rainfall.  
570 *Oecologia* **133**, 95-101 (2002).
- 571 35 Vogel, A. *et al.* Separating drought effects from roof artifacts on ecosystem processes in a  
572 grassland drought experiment. *PLOS One* **8**, e70997 (2013).
- 573 36 Kratz, W. The bait-lamina test. *Environmental Science and Pollution Research* **5**, 94-96 (1998).
- 574 37 Gardi, C. *et al.* Soil biodiversity monitoring in Europe: ongoing activities and challenges. *European*  
575 *Journal of Soil Science* **60**, 807-819 (2009).
- 576 38 Hamel, C., Schellenberg, M. P., Hanson, K. & Wang, H. Evaluation of the “bait-lamina test” to  
577 assess soil microfauna feeding activity in mixed grassland. *Applied Soil Ecology* **36**, 199-204 (2007).
- 578 39 Rozen, A., Sobczyk, Ł., Liszka, K. & Weiner, J. Soil faunal activity as measured by the bait-lamina  
579 test in monocultures of 14 tree species in the Siemianice common-garden experiment, Poland.  
580 *Applied Soil Ecology* **45**, 160-167 (2010).
- 581 40 Simpson, J. E., Slade, E., Riutta, T. & Taylor, M. E. Factors affecting soil fauna feeding activity in a  
582 fragmented lowland temperate deciduous woodland. *PLOS One* **7**, e29616 (2012).
- 583 41 Thakur, M. P. *et al.* Reduced feeding activity of soil detritivores under warmer and drier  
584 conditions. *Nature Climate Change* **8**, 75 (2018).
- 585 42 Scheu, S. Automated measurement of the respiratory response of soil microcompartments: active  
586 microbial biomass in earthworm faeces. *Soil Biology and Biochemistry* **24**, 1113-1118 (1992).



- 587 43 Anderson, J. & Domsch, K. A physiological method for the quantitative measurement of microbial  
588 biomass in soils. *Soil Biology and Biochemistry* **10**, 215-221 (1978).
- 589 44 Ruess, L. Studies on the nematode fauna of an acid forest soil: spatial distribution and extraction.  
590 *Nematologica*, **41** **1**, 229-239 (1995).
- 591 45 Bongers, T. The nematodes of the Netherlands. *The nematodes of the Netherlands*. (1988).
- 592 46 Yeates, G., Bongers, T., De Goede, R., Freckman, D. & Georgieva, S. Feeding habits in soil  
593 nematode families and genera—an outline for soil ecologists. *Journal of Nematology* **25**, 315  
594 (1993).
- 595 47 Okada, H., Harada, H. & Kadota, I. Fungal-feeding habits of six nematode isolates in the genus  
596 *Filenchus*. *Soil Biology and Biochemistry* **37**, 1113-1120 (2005).
- 597 48 Bongers, T. The maturity index: an ecological measure of environmental disturbance based on  
598 nematode species composition. *Oecologia* **83**, 14-19 (1990).
- 599 49 Bongers, T. & Bongers, M. Functional diversity of nematodes. *Applied Soil Ecology* **10**, 239-251  
600 (1998).
- 601 50 Ferris, H., Bongers, T. & De Goede, R. A framework for soil food web diagnostics: extension of the  
602 nematode faunal analysis concept. *Applied Soil Ecology* **18**, 13-29 (2001).
- 603 51 Pinheiro, J., Bates, D., DebRoy, S., Sarkar, D. & Team, R. C. nlme: Linear and nonlinear mixed  
604 effects models (R package version 3.1-128, 2016). *R software* (2017).
- 605 52 Wan, S., Norby, R. J., Ledford, J. & Weltzin, J. F. Responses of soil respiration to elevated CO<sub>2</sub>, air  
606 warming, and changing soil water availability in a model old-field grassland. *Global Change Biology*  
607 **13**, 2411-2424 (2007).
- 608 53 Kent, A. D. & Triplett, E. W. Microbial communities and their interactions in soil and rhizosphere  
609 ecosystems. *Annual Reviews in Microbiology* **56**, 211-236 (2002).
- 610 54 Barton, K. (2018).
- 611 55 Bates, D., Mächler, M., Bolker, B. & Walker, S. Fitting linear mixed-effects models using lme4. *arXiv*  
612 *preprint arXiv:1406.5823* (2014).
- 613 56 Lüdtke, D.ggeffects: Create Tidy Data Frames of Marginal Effects for ggplot (Version 0.3.4). *R*  
614 *software* (2018).
- 615 57 R Core Team, R. C. T. (2017).
- 616 58 Coleman, D. C., Crossley Jr, D. A. & Hendrix, P. F. *Fundamentals of soil ecology*. (Academic press,  
617 2004).
- 618 59 Manzoni, S., Schimel, J. P. & Porporato, A. Responses of soil microbial communities to water  
619 stress: results from a meta-analysis. *Ecology* **93**, 930-938 (2012).
- 620 60 Briones, M. J. I., Ineson, P. & Pearce, T. G. Effects of climate change on soil fauna; responses of  
621 enchytraeids, Diptera larvae and tardigrades in a transplant experiment. *Applied Soil Ecology* **6**,  
622 117-134 (1997).
- 623 61 Gongalsky, K. B., Persson, T. & Pokarzhevskii, A. D. Effects of soil temperature and moisture on  
624 the feeding activity of soil animals as determined by the bait-lamina test. *Applied Soil Ecology* **39**,  
625 84-90 (2008).
- 626 62 Helling, B., Pfeiff, G. & Larink, O. A comparison of feeding activity of collembolan and enchytraeid  
627 in laboratory studies using the bait-lamina test. *Applied Soil Ecology* **7**, 207-212 (1998).
- 628 63 Frampton, G. K., Van Den Brink, P. J. & Gould, P. J. Effects of spring drought and irrigation on  
629 farmland arthropods in southern Britain. *Journal of Applied Ecology* **37**, 865-883 (2000).
- 630 64 Maraldo, K. & Holmstrup, M. Enchytraeids in a changing climate: a mini-review. *Pedobiologia* **53**,  
631 161-167 (2010).
- 632 65 Siepel, H. Biodiversity of soil microarthropods: the filtering of species. *Biodiversity & Conservation*  
633 **5**, 251-260 (1996).

- 634 66 Wever, L. A., Lysyk, T. J. & Clapperton, M. J. The influence of soil moisture and temperature on  
635 the survival, aestivation, growth and development of juvenile Aporrectodea tuberculata  
636 (Eisen)(Lumbricidae). *Pedobiologia* **45**, 121-133 (2001).
- 637 67 Griffiths, R. I., Whiteley, A. S., O'Donnell, A. G. & Bailey, M. J. Physiological and community  
638 responses of established grassland bacterial populations to water stress. *Applied and  
639 environmental microbiology* **69**, 6961-6968 (2003).
- 640 68 Pailler, A., Vennetier, M., Torre, F., Ripert, C. & Guiral, D. Forest soil microbial functional patterns  
641 and response to a drought and warming event: Key role of climate–plant–soil interactions at a  
642 regional scale. *Soil Biology and Biochemistry* **70**, 1-4 (2014).
- 643 69 Harris, R. Effect of water potential on microbial growth and activity. *Water potential relations in  
644 soil microbiology*, 23-95 (1981).
- 645 70 Roberson, E. B. & Firestone, M. K. Relationship between desiccation and exopolysaccharide  
646 production in a soil *Pseudomonas* sp. *Applied and Environmental Microbiology* **58**, 1284-1291  
647 (1992).
- 648 71 Deng, Q. *et al.* Responses of soil respiration to elevated carbon dioxide and nitrogen addition in  
649 young subtropical forest ecosystems in China. *Biogeosciences* **7**, 315-328 (2010).
- 650 72 Sorensen, P. O., Germino, M. J. & Feris, K. P. Microbial community responses to 17 years of altered  
651 precipitation are seasonally dependent and coupled to co-varying effects of water content on  
652 vegetation and soil C. *Soil Biology and Biochemistry* **64**, 155-163 (2013).
- 653 73 Tonkin, J. D., Bogan, M. T., Bonada, N., Rios-Touma, B. & Lytle, D. A. Seasonality and predictability  
654 shape temporal species diversity. *Ecology* **98**, 1201-1216 (2017).
- 655 74 Cruz-Martínez, K. *et al.* Despite strong seasonal responses, soil microbial consortia are more  
656 resilient to long-term changes in rainfall than overlying grassland. *The ISME journal* **3**, 738 (2009).
- 657 75 Waldrop, M. & Firestone, M. Seasonal dynamics of microbial community composition and  
658 function in oak canopy and open grassland soils. *Microbial Ecology* **52**, 470-479 (2006).
- 659 76 Campbell, B. J., Polson, S. W., Hanson, T. E., Mack, M. C. & Schuur, E. A. The effect of nutrient  
660 deposition on bacterial communities in Arctic tundra soil. *Environmental microbiology* **12**, 1842-  
661 1854 (2010).
- 662 77 Cusack, D. F., Silver, W. L., Torn, M. S., Burton, S. D. & Firestone, M. K. Changes in microbial  
663 community characteristics and soil organic matter with nitrogen additions in two tropical forests.  
664 *Ecology* **92**, 621-632 (2011).
- 665 78 Bais, H. P., Weir, T. L., Perry, L. G., Gilroy, S. & Vivanco, J. M. The role of root exudates in  
666 rhizosphere interactions with plants and other organisms. *Annu. Rev. Plant Biol.* **57**, 233-266  
667 (2006).
- 668 79 Wardle, D. & Yeates, G. The dual importance of competition and predation as regulatory forces in  
669 terrestrial ecosystems: evidence from decomposer food-webs. *Oecologia* **93**, 303-306 (1993).
- 670 80 Graenitz, J. & Bauer, R. The effect of fertilization and crop rotation on biological activity in a 90  
671 year long-term experiment. *BODENKULTUR-WIEN AND MUNCHEN-* **51**, 99-106 (2000).
- 672 81 Van der Wal, A. *et al.* Dissimilar response of plant and soil biota communities to long-term nutrient  
673 addition in grasslands. *Biology and fertility of soils* **45**, 663-667 (2009).
- 674 82 Maraun, M. *et al.* Indirect effects of carbon and nutrient amendments on the soil meso-and  
675 microfauna of a beechwood. *Biology and Fertility of Soils* **34**, 222-229 (2001).
- 676 83 Kaneko, N. & Kofuji, R.-i. Effects of soil pH gradient caused by stemflow acidification on soil  
677 microarthropod community structure in a Japanese red cedar plantation: an evaluation of  
678 ecological risk on decomposition. *Journal of forest research* **5**, 157-162 (2000).
- 679 84 Wang, S., Tan, Y., Fan, H., Ruan, H. & Zheng, A. Responses of soil microarthropods to inorganic  
680 and organic fertilizers in a poplar plantation in a coastal area of eastern China. *Applied Soil Ecology*  
681 **89**, 69-75 (2015).

- 682 85 Fierer, N., Strickland, M. S., Liptzin, D., Bradford, M. A. & Cleveland, C. C. Global patterns in  
683 belowground communities. *Ecology letters* **12**, 1238-1249 (2009).
- 684 86 Gudleifsson, B. Impact of long term use of fertilizer on surface invertebrates in experimental plots  
685 in a permanent hayfield in Northern-Iceland. *Agric. Soc. Iceland* **15**, 37-49 (2002).
- 686 87 Kaneko, N., McLean, M. & Parkinson, D. Grazing preference of *Onychiurus subtenuis* (Collembola)  
687 and *Oppiella nova* (Oribatei) for fungal species inoculated on pine needles. *Pedobiologia* **39**, 538-  
688 546 (1995).
- 689 88 Zhou, L. *et al.* Interactive effects of global change factors on soil respiration and its components:  
690 a meta-analysis. *Global change biology* **22**, 3157-3169 (2016).
- 691 89 Gough, L., Osenberg, C. W., Gross, K. L. & Collins, S. L. Fertilization effects on species density and  
692 primary productivity in herbaceous plant communities. *Oikos* **89**, 428-439 (2000).
- 693 90 Bobbink, R. *et al.* Global assessment of nitrogen deposition effects on terrestrial plant diversity: a  
694 synthesis. *Ecological applications* **20**, 30-59 (2010).
- 695 91 Thuiller, W., Lavorel, S., Araújo, M. B., Sykes, M. T. & Prentice, I. C. Climate change threats to plant  
696 diversity in Europe. *Proceedings of the National Academy of Sciences of the United States of*  
697 *America* **102**, 8245-8250 (2005).
- 698 92 Carrillo, Y., Ball, B. A., Strickland, M. S. & Bradford, M. A. Legacies of plant litter on carbon and  
699 nitrogen dynamics and the role of the soil community. *Pedobiologia* **55**, 185-192 (2012).
- 700 93 Cornwell, W. K. *et al.* Plant species traits are the predominant control on litter decomposition  
701 rates within biomes worldwide. *Ecology letters* **11**, 1065-1071 (2008).
- 702 94 Briones, M., Bol, R., Sleep, D., Allen, D. & Sampedro, L. Spatio-temporal variation of stable isotope  
703 ratios in earthworms under grassland and maize cropping systems. *Soil Biology and Biochemistry*  
704 **33**, 1673-1682 (2001).
- 705 95 Dyckmans, J., Scrimgeour, C. M. & Schmidt, O. A simple and rapid method for labelling  
706 earthworms with <sup>15</sup>N and <sup>13</sup>C. *Soil Biology and Biochemistry* **37**, 989-993 (2005).

707
